# Supplementary material for: From taxonomic deflation to newly detected cryptic species: Hidden diversity in a widespread African squeaker catfish
Source: PubMed Central journal article supplement (PMC6823466; doi:10.1038/s41598-019-52306-2), 2019-10-31
Supplement: 41598_2019_52306_MOESM1_ESM.pdf [file 41598_2019_52306_MOESM1_ESM.pdf]

## From taxonomic deflation to newly detected cryptic species: Hidden diversity in a widespread African squeaker catfish

Dagmar Jirsová<sup>1,2\*</sup>, Jan Štefka<sup>1,2</sup>, Radim Blažek<sup>3,4</sup>, John O. Malala<sup>5</sup>, David E. Lotuliakou<sup>5</sup>, Zuheir N. Mahmoud<sup>6</sup>, Miloslav Jirků<sup>2</sup>

### Supplementary data

**Table S1.** Sequences of *cox1*, *cytb* and *RAG2* for *Synodontis* spp. from the Nile and Turkana deposited in GenBank, including detailed information on localities. Data provided in separate file.

**Table S2.** List of GenBank *cox1*, *cytb* and *RAG2* *Synodontis* spp. sequences used in phylogenetic and haplotype analyses. Data provided in separate file. The data obtained from the same sample are highlighted by bold.

**Table S3.** Results of chi-square test for spatial distribution of *S. schall*, *S. frontosus* and intermediate morphotypes.

| obs. | El Molo | Kalokol | Todonyang | totals(marginals) |  |
|------|---------|---------|-----------|-------------------|--|
| 1    | 35      | 19      | 32        | 86                |  |
| 2    | 16      | 11      | 31        | 58                |  |
| 3    | 7       | 0       | 14        | 21                |  |
|      | 58      | 30      | 77        | 165               |  |

  

| obs. frekv. | El Molo | Kalokol | Todonyang | null (expected) |  |
|-------------|---------|---------|-----------|-----------------|--|
| 1           | 0,603   | 0,63    | 0,415     | 0,52            |  |
| 2           | 0,276   | 0,36    | 0,402     | 0,35            |  |
| 3           | 0,121   | 0       | 0,181     | 0,13            |  |

  

| expected counts | El Molo | Kalokol | Todonyang |  |  |
|-----------------|---------|---------|-----------|--|--|
| 1               | 30,23   | 15,63   | 40,13     |  |  |
| 2               | 20,38   | 10,54   | 27,06     |  |  |
| 3               | 7,38    | 3,81    | 9,8       |  |  |

  

|          | El Molo | Kalokol | Todonyang |               |  |
|----------|---------|---------|-----------|---------------|--|
| $\chi^2$ | 0,753   | 0,723   | 1,648     |               |  |
|          | 0,944   | 0,019   | 0,571     |               |  |
|          | 0,019   | 3,818   | 1,8       |               |  |
|          | 1,716   | 4,561   | 4,019     | <b>10,297</b> |  |

  

|                       |              |  |  |  |  |
|-----------------------|--------------|--|--|--|--|
| <b>P(=0,05; df=4)</b> | <b>9,488</b> |  |  |  |  |
|-----------------------|--------------|--|--|--|--|

**Table S4.** Results of population genetics analyses between *S. schall*-like and *S. frontosus*-like morphotype from Eastern Africa (the Nile and Turkana) obtained for this study. The genetic differentiation between the sequences from three Turkana localities was tested by the *Snn* test and showed that the saline locality differs from the freshwater and medium part.

|                                                       | <b>Haplotype diversity</b>     |             |                   |          |
|-------------------------------------------------------|--------------------------------|-------------|-------------------|----------|
|                                                       | <i>coxI</i>                    | <i>cytb</i> |                   |          |
| <i>S. schall</i> -like                                | 0.36                           | 0.97        |                   |          |
| <i>S. frontosus</i> -like                             | 0.65                           | 0.97        |                   |          |
|                                                       |                                |             |                   |          |
|                                                       | <b>Fst</b>                     |             |                   |          |
|                                                       | <i>coxI</i>                    | <i>cytb</i> |                   |          |
| <i>S. schall</i> -like x<br><i>S. frontosus</i> -like | 0.08                           | 0.04        |                   |          |
|                                                       |                                |             |                   |          |
|                                                       | <b>Genetic differentiation</b> |             |                   |          |
|                                                       | <i>coxI</i>                    |             | <i>cytb</i>       |          |
|                                                       | <i>Chi-square</i>              | <i>P</i>    | <i>Chi-square</i> | <i>P</i> |
| <i>S. schall</i> -like x<br><i>S. frontosus</i> -like | 34.487                         | 0.0029      | 51.934            | 0.1922   |
|                                                       |                                |             |                   |          |
|                                                       | <b>Genetic distance</b>        |             |                   |          |
|                                                       | <i>coxI</i>                    | <i>cytb</i> |                   |          |
| <i>S. schall</i> -like                                | 0 - 0.88 %                     | 0 - 1.75%   |                   |          |
| <i>S. frontosus</i> -like                             | 0 - 1.06%                      | 0 - 1.95%   |                   |          |
| <i>S. schall</i> -like x<br><i>S. frontosus</i> -like | 0 - 1.06%                      | 0 - 2.06%   |                   |          |

| <b>Turkana localities</b> |                            |             |              |                 |                 |            |              |
|---------------------------|----------------------------|-------------|--------------|-----------------|-----------------|------------|--------------|
|                           | <b>Haplotype diversity</b> |             |              |                 |                 |            |              |
|                           | <i>coxI</i>                | <i>cytb</i> |              |                 |                 |            |              |
| Medium salinity           | 0.38                       | 1.00        |              |                 |                 |            |              |
| Freshwater                | 0.40                       | 0.98        |              |                 |                 |            |              |
| Saline water              | 0.67                       | 0.93        |              |                 |                 |            |              |
|                           |                            |             |              |                 |                 |            |              |
|                           | <b>Fst</b>                 |             |              |                 |                 |            |              |
|                           | <i>coxI</i>                |             |              |                 | <i>cytb</i>     |            |              |
|                           | Medium salinity            | Freshwater  | Saline water |                 | Medium salinity | Freshwater | Saline water |
| Medium salinity           | x                          |             |              | Medium salinity | x               |            |              |
| Freshwater                | 0.00585                    | x           |              | Freshwater      | 0.063           | x          |              |
| Saline water              | 0.18779                    | 0.17877     | x            | Saline water    | 0.047           | 0.010      | x            |
|                           |                            |             |              |                 |                 |            |              |
|                           | <b>Snn test</b>            |             |              |                 |                 |            |              |
|                           | <i>coxI</i>                | <i>cytb</i> |              |                 |                 |            |              |
| <i>Snn</i>                | 0.68                       | 0.543       |              |                 |                 |            |              |
| <i>P-value</i>            | 0.018                      | 0.094*      |              |                 |                 |            |              |
| * not significant P-value |                            |             |              |                 |                 |            |              |



b

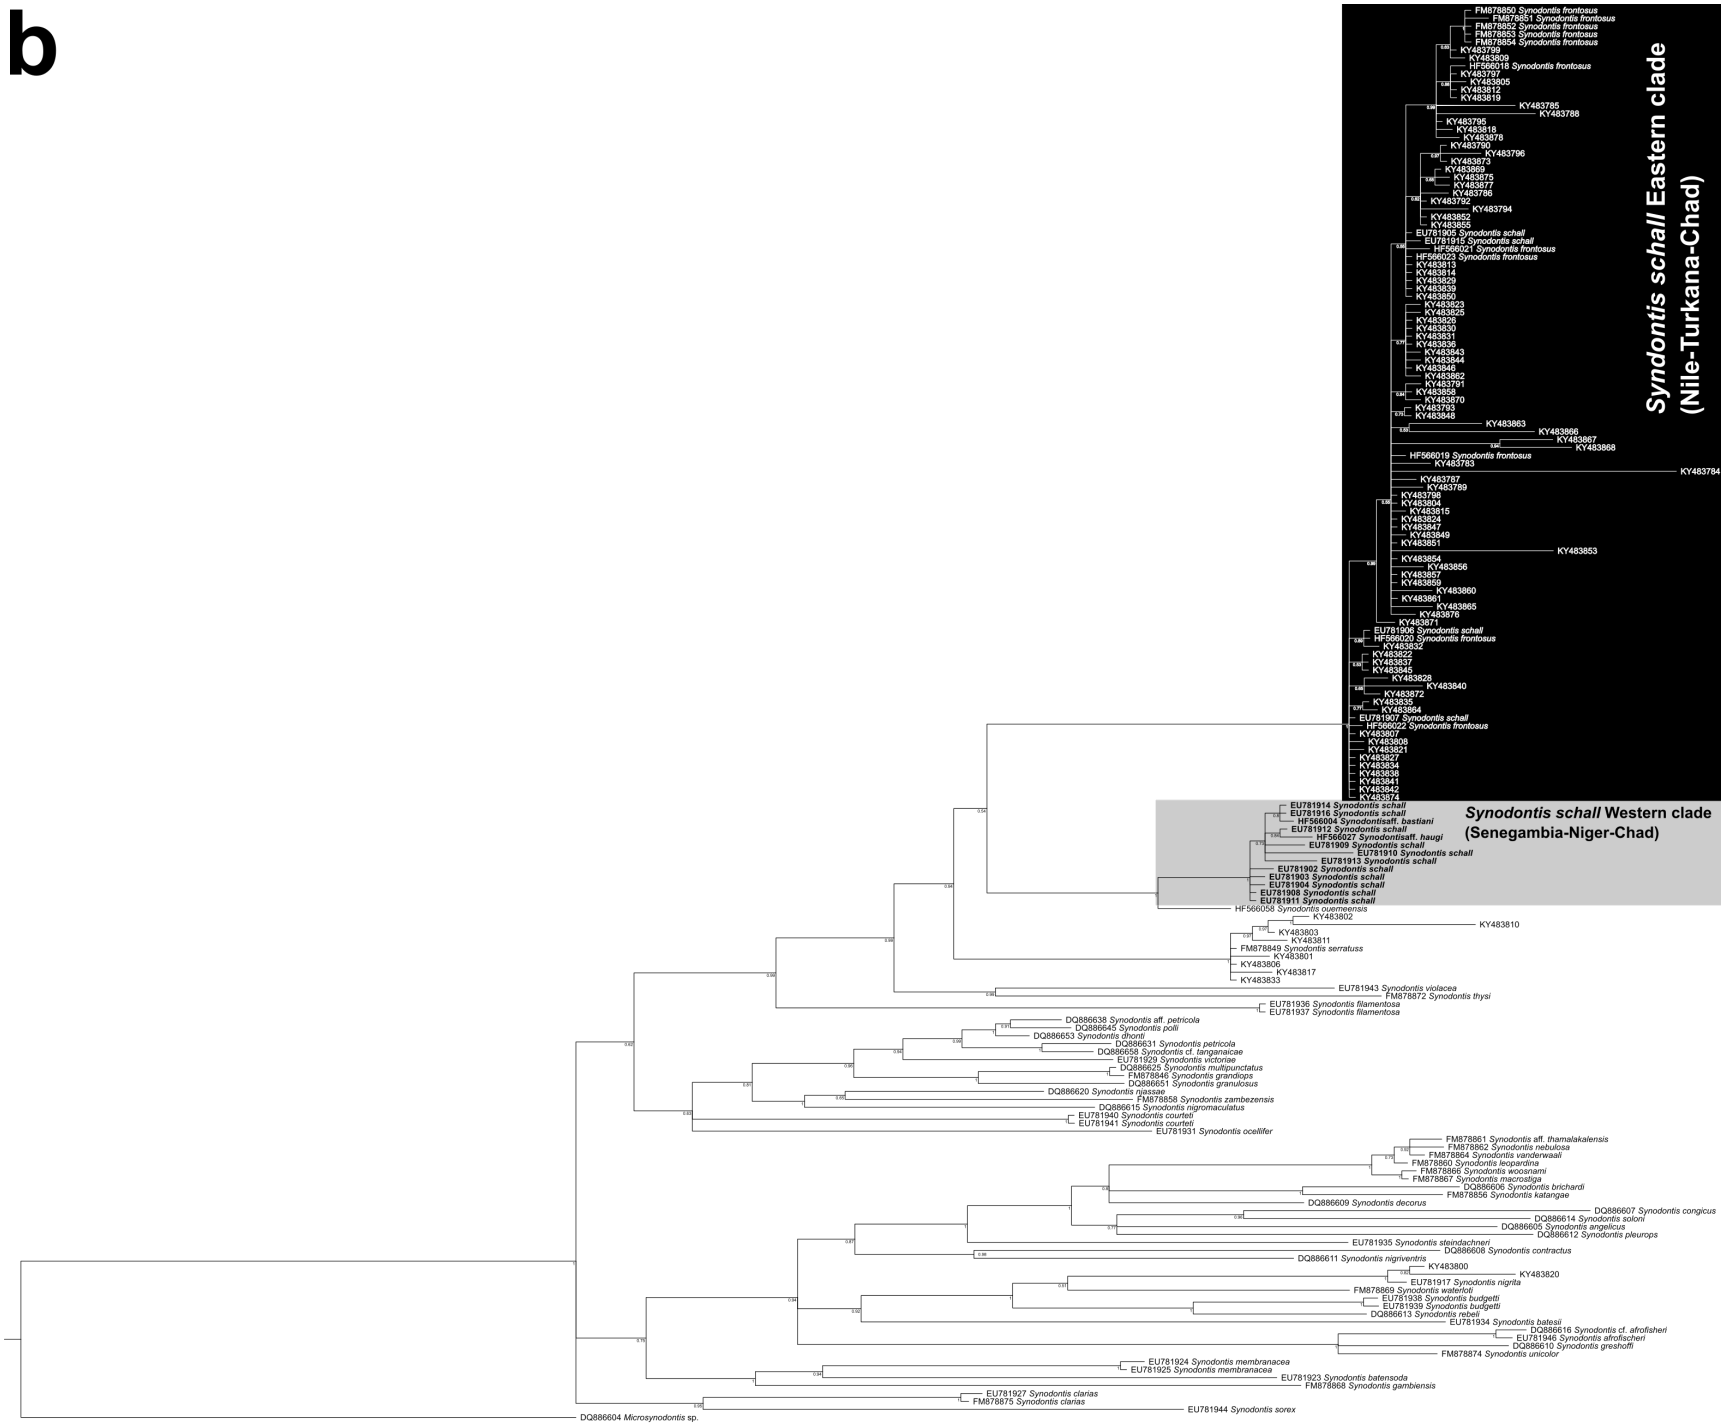

**C**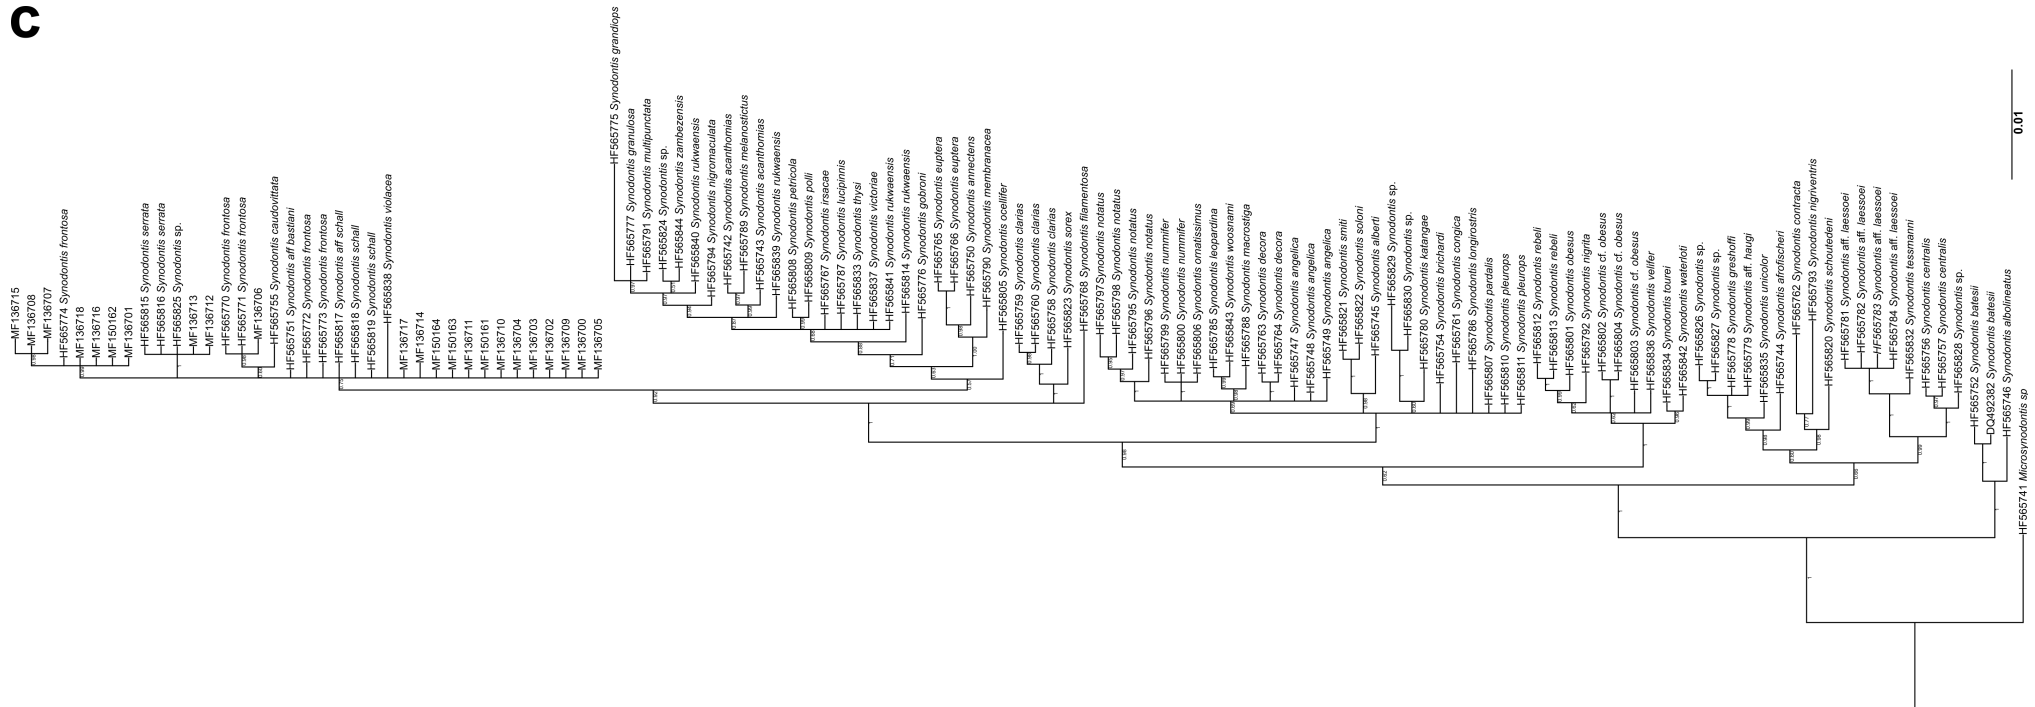

**Figure S1.** Phylogenetic trees for *cox1* a), *cytb* b) and *RAG2* c) as revealed by BI analyses, showing detailed branching with posterior probabilities as branch supports. Final trees were created by software MrBayes. Sequence data of *S. schall* Eastern clade obtained within the scope of this study are presented with GenBank numbers. Data provided in separate file (see Tab. S2).

a

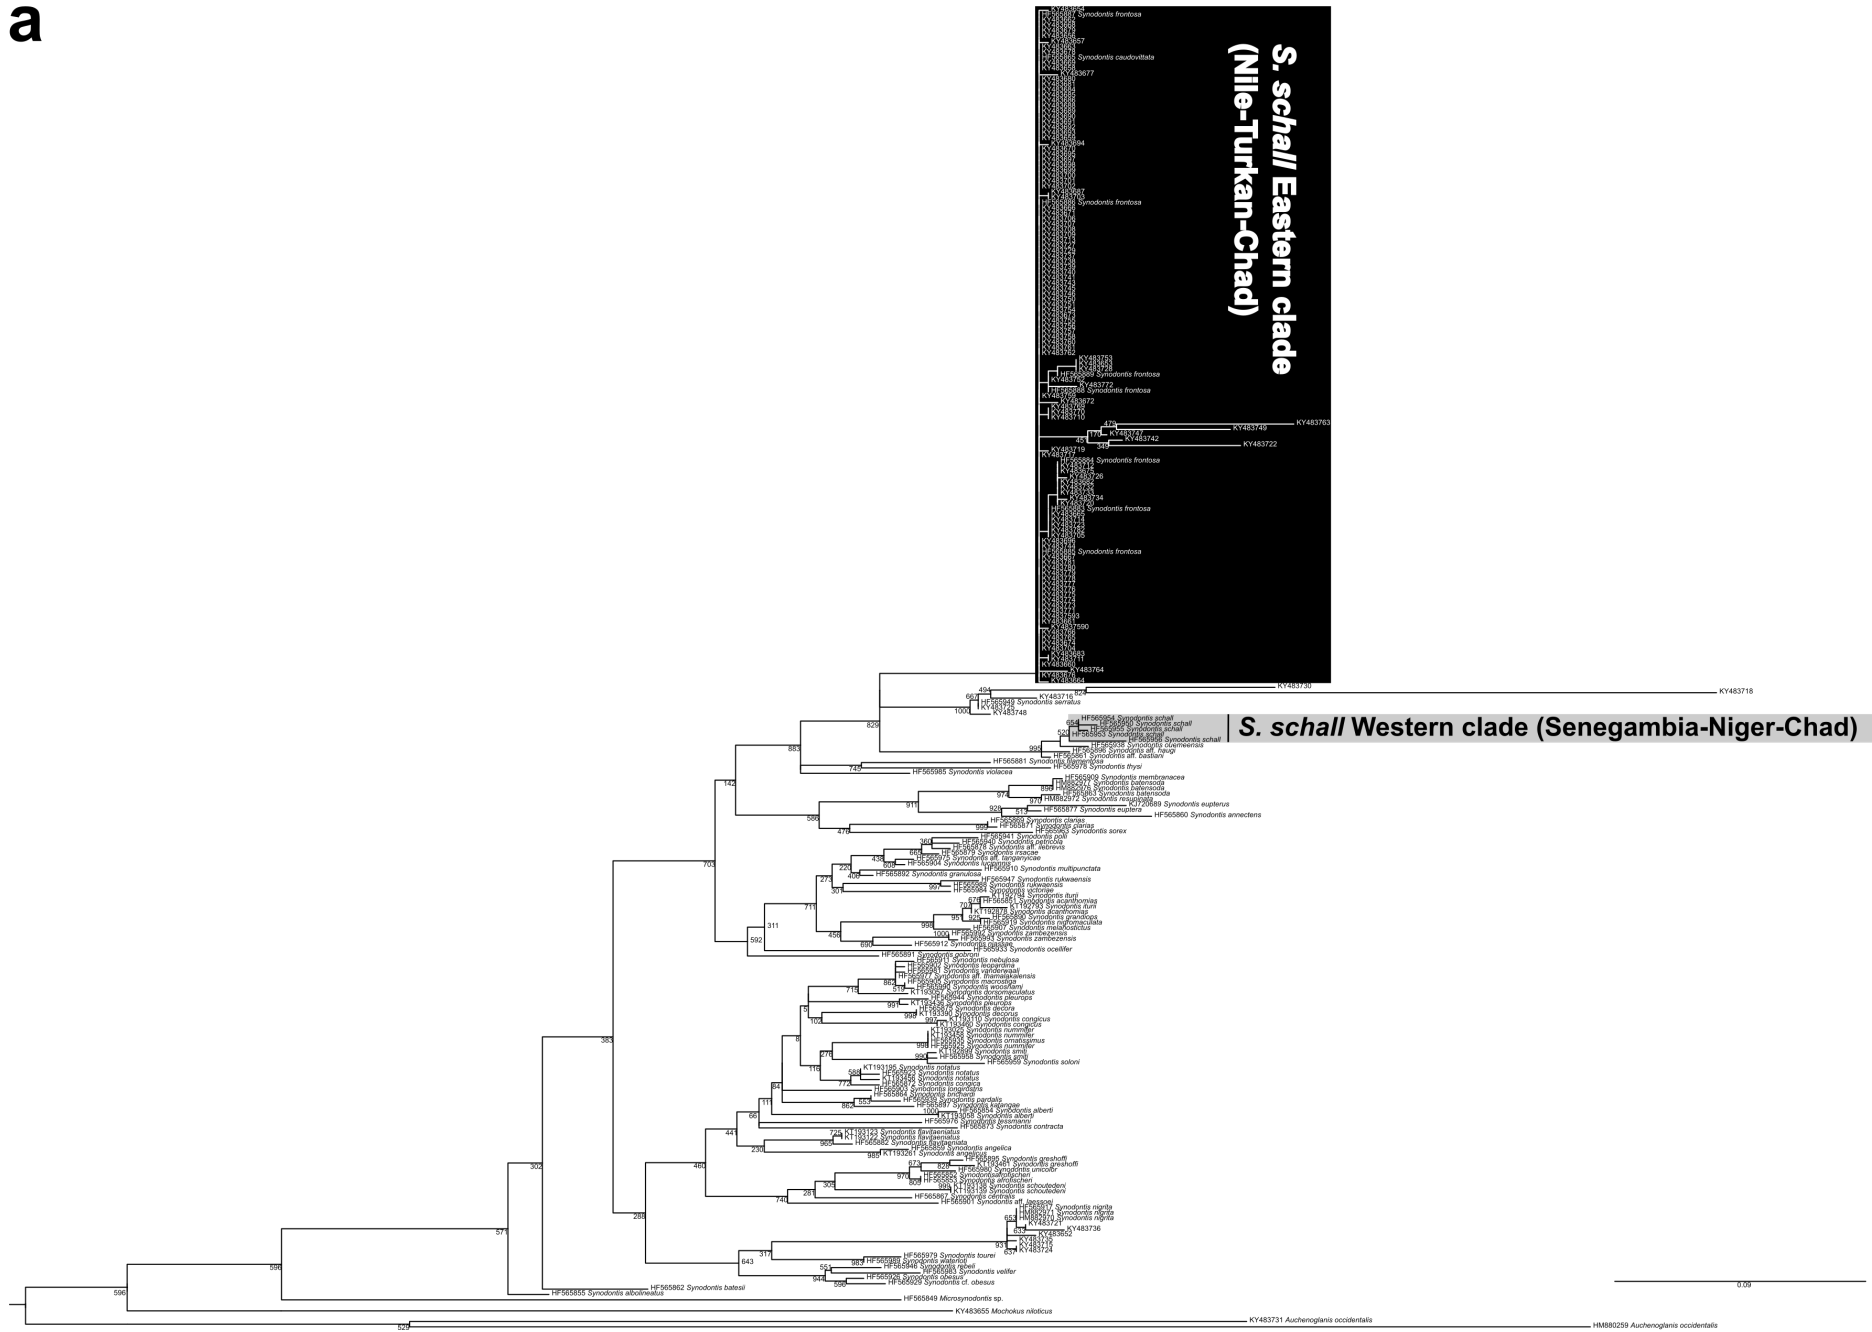

b

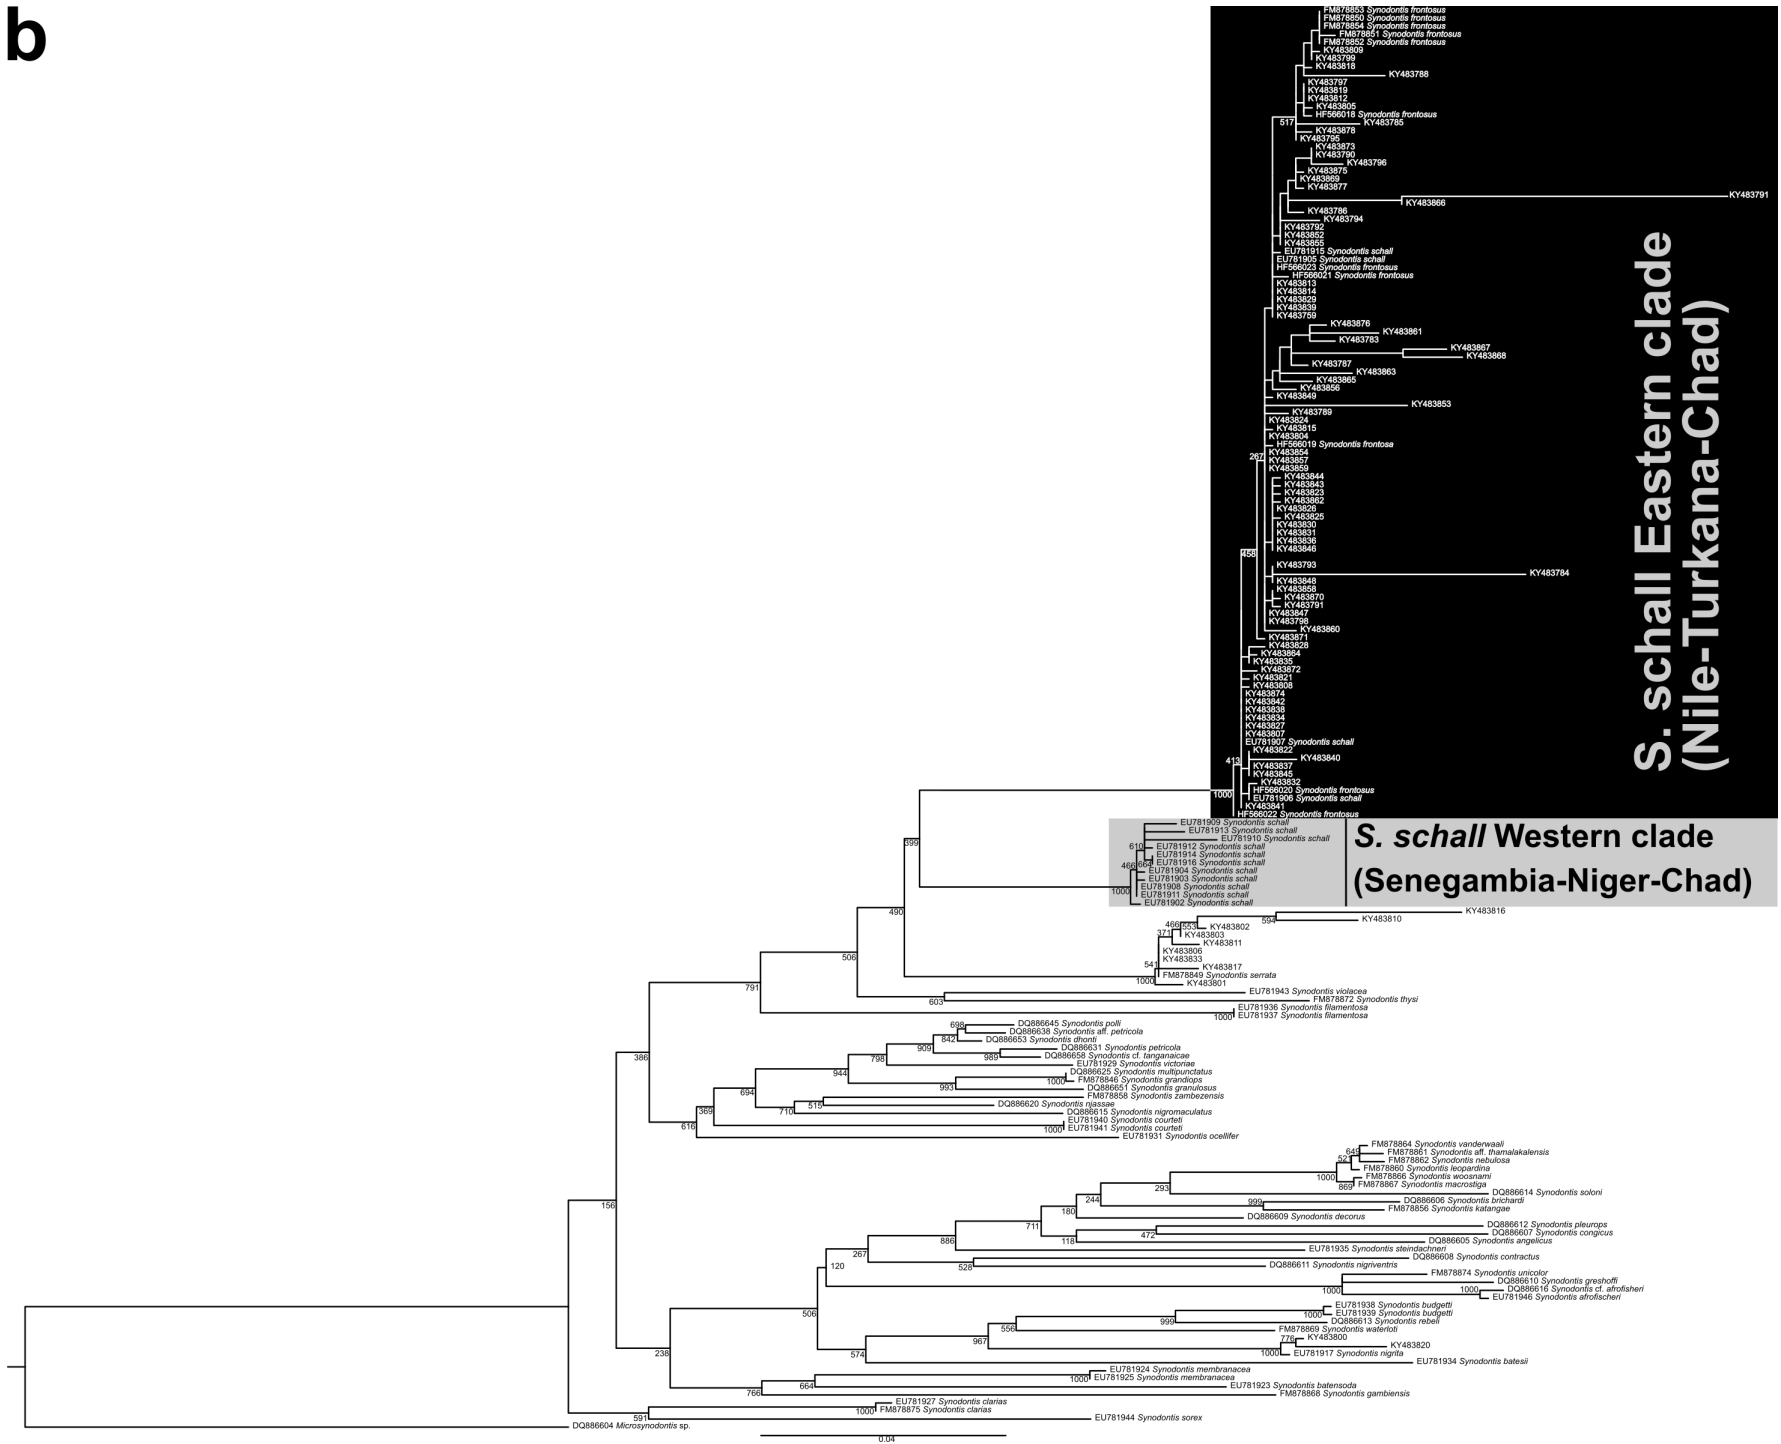

C

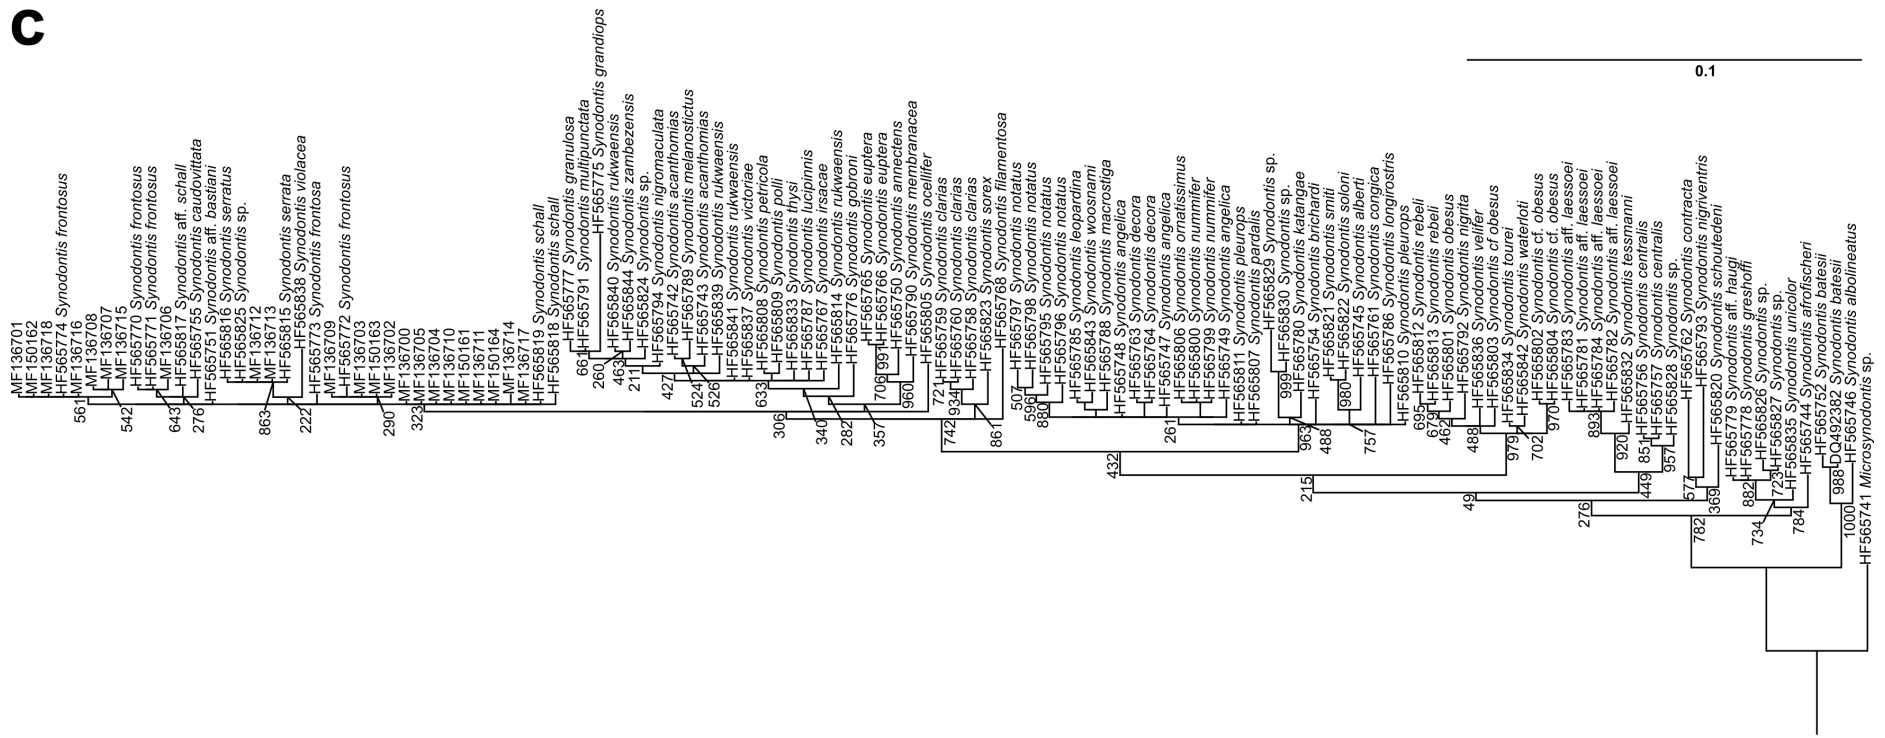

**Figure S2.** Phylogenetic trees for *coxI* a), *cytb* b) and *RAG2* c) as revealed by ML analyses, showing detailed branching with bootstraps as branch supports. Sequence data of *S. schall* Eastern clade obtained within the scope of this study are presented with GenBank numbers (see Tab. S2).



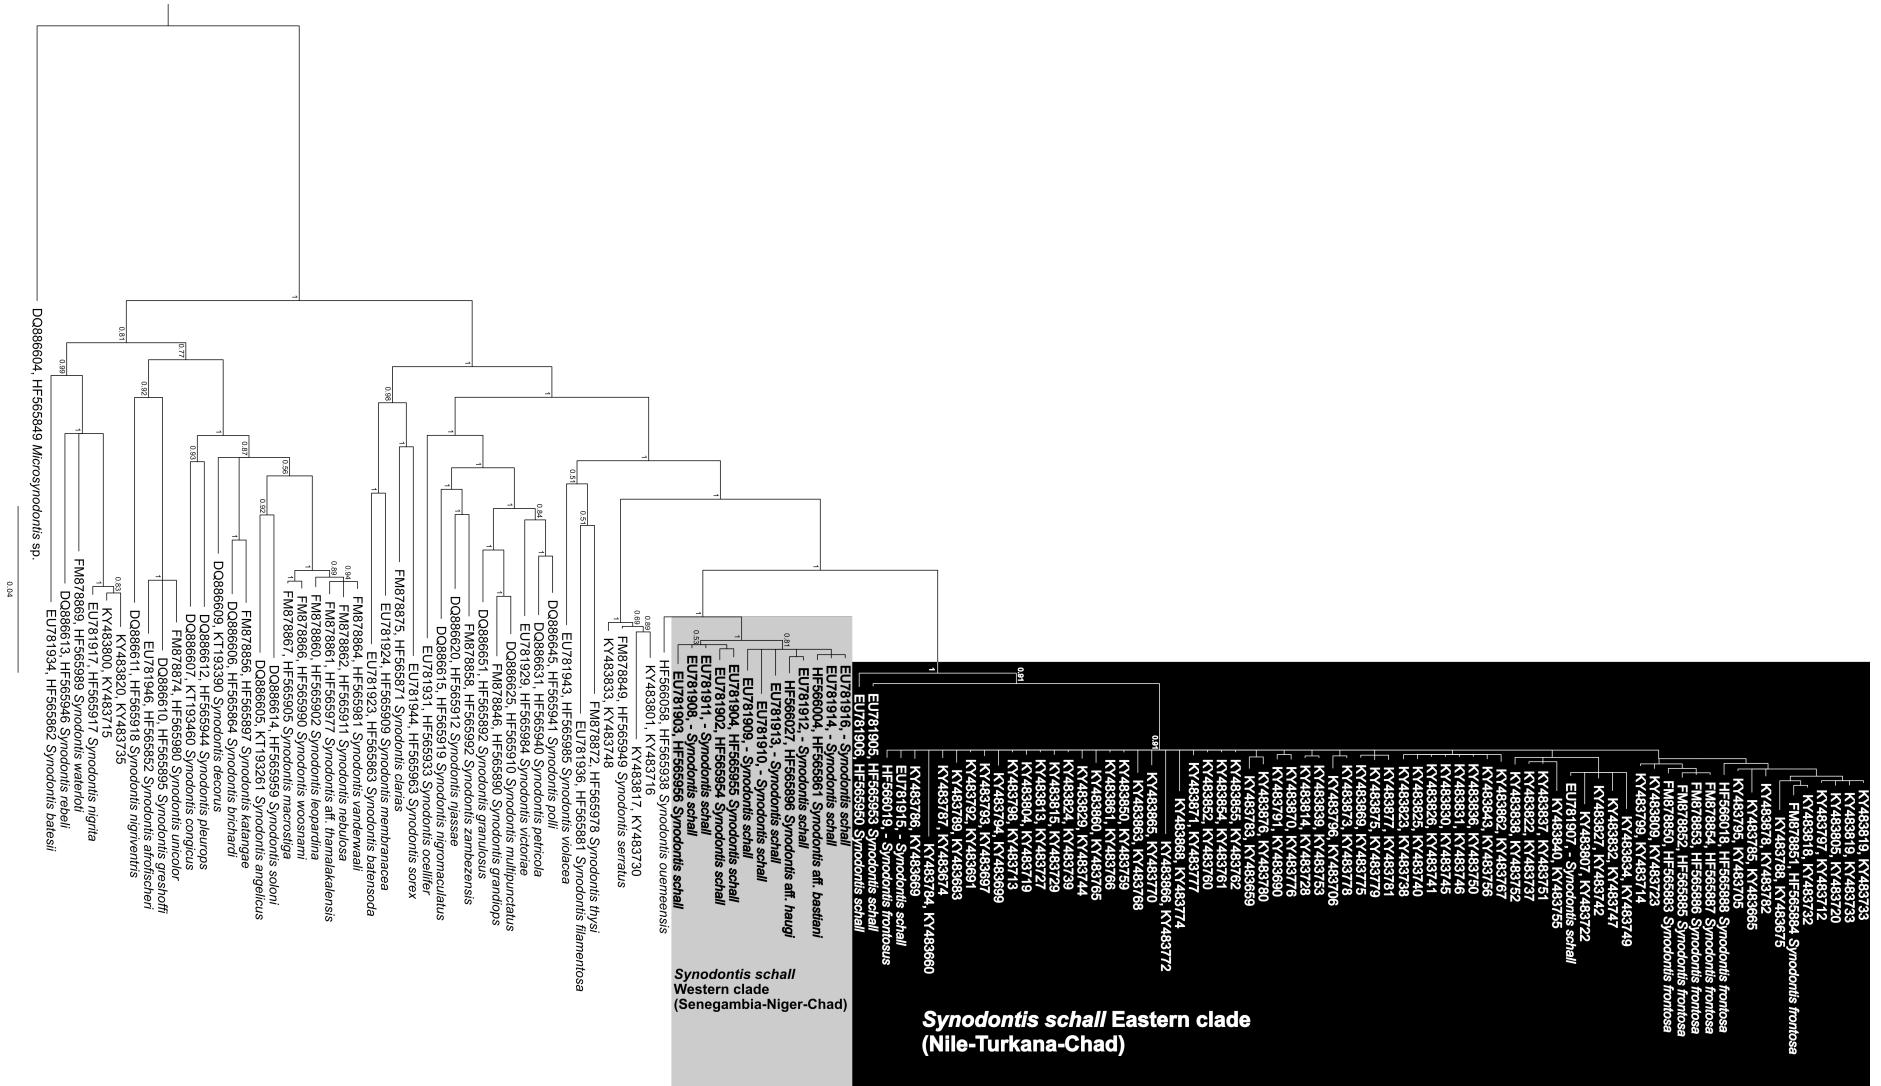

**Figure S3.** Phylogenetic analysis of concatenated dataset for mt genes (*cox1* and *cytb*) as revealed by BI analyses, showing detailed branching with posterior probabilities as branch supports. Final trees were created by software MrBayes. Sequence data of *S. schall* Eastern clade obtained within the scope of this study are presented with GenBank numbers. Data provided in separate file (see Tab. S1 and S2).

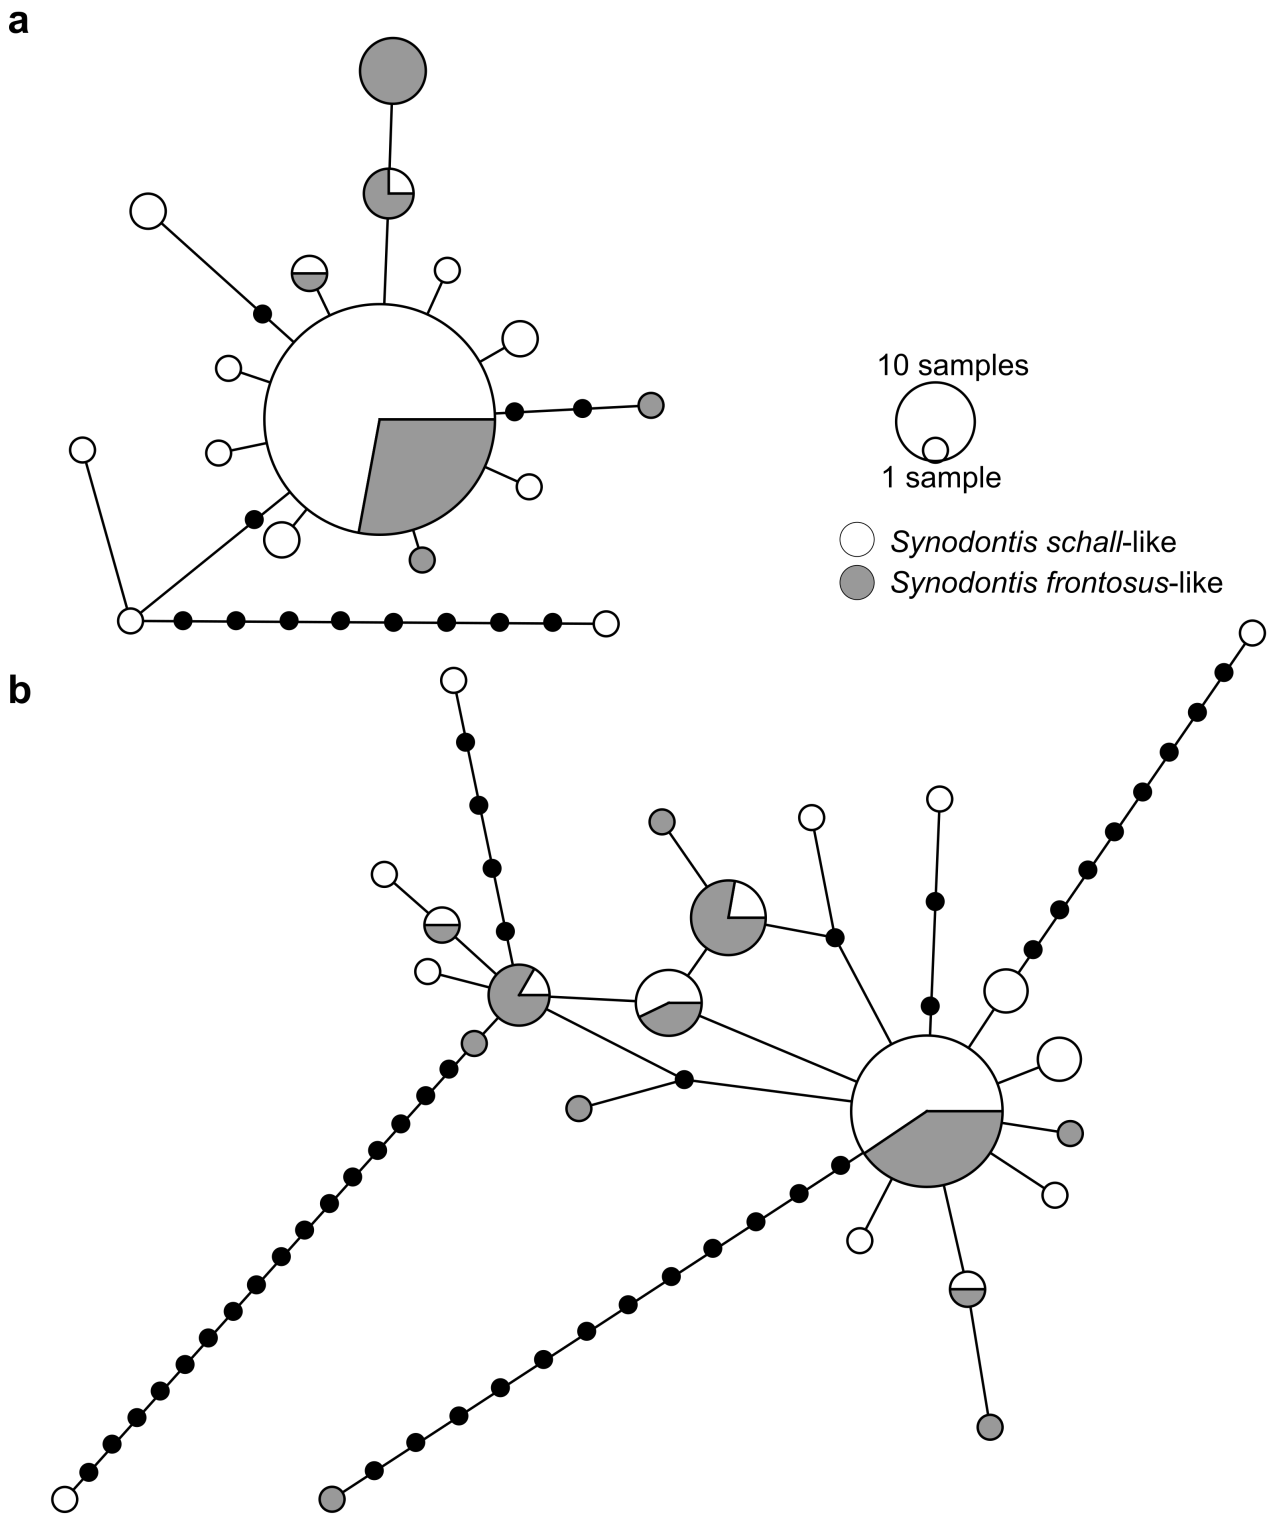

**Figure S4.** Haplotype networks for *coxI* (a) and *cytb* (b) constructed in software PopART v1.7. Networks were constructed only for samples obtained for this study. Sizes of haplo-nodes are relative to the sample size.
